# Supplementary material for: Machine learning-based q-RASPR predictions of detonation heat for nitrogen-containing compounds
Source: Royal Society of Chemistry journal article supplement (doi:10.1039/d3ma00535f), 2023-01-01
Supplement: d3ma00535f1.xlsx [file d3ma00535f1.xlsx]

## Sheet: SI-1
Machine learning-based q-RASPR predictions of detonation heat for nitrogen-containing compounds
Shubham Kumar Pandey, Arkaprava Banerjee, Kunal Roy*
Department of Pharmaceutical Technology
Jadavpur University, Kolkata 700032, India
Email: kunal.roy@jadavpuruniversity.in
Supplementary Materials SI-1
*Corresponding authors
Prof. Kunal Roy, Phone: +91 98315 94140;
Fax: +91-33-2837-1078
Email: kunalroy_in@yahoo.com; kunal.roy@jadavpuruniversity.in

## Sheet: Compounds
Supplementary Materials SI-1
S. No.	Train/test	Compounds name	Observed value of detonation heat ( kJ/kg )	SMILES strings
1	Train	3,6-Dihydrazino-1,2,4,5-tetrazine	3446.08	NNC1=NN=C(NN)N=N1
2	Train	2,6-Diamino-3-nitro-5-methyloxypyrazine-1-oxide	5042.26	[O-][N+]1=C(N)C(C[O-])=NC([N+]([O-])=O)=C1N
3	Train	4-amino-3,5-dinitropyrazole	5380.67	O=[N+](C1=C(N)C([N+]([O-])=O)=NN1)[O-]
4	Train	2,4,6-Trichloro-[1,3,5]triazine	432.83	ClC1=NC(Cl)=NC(Cl)=N1
5	Train	2-nitro-triazol-5-one	4316.69	O=C1C=NN([N+]([O-])=O)N1
6	Train	1,1'-Dinitro-3,3'-Azo-1,2,4-triazole	9040.43	O=[N+](N1N=C(/N=N/C2=NN([N+]([O-])=O)C=N2)N=C1)[O-]
7	Train	4,6-Bis(5-amino-3-nitro-1,2,4-triazolyl)-5-nitropyrimidine	5079.97	O=[N+](C1=C(N3N=C([N+]([O-])=O)N=C3N)N=CN=C1N2N=C([N+]([O-])=O)N=C2N)[O-]
8	Train	3-nitro-1,2,4-triazole	5142.22	O=[N+](C1=NNC=N1)[O-]
9	Train	3-Amino-5-nitro-1,2,4-triazole	4332.7	O=[N+](C1=NC(N)=NN1)[O-]
10	Train	5-nitro-2,4,6-triamino-pyrimidine-1,3-dioxide	4141.69	[O-][N+]1=C(N)[N+]([O-])=C(N)C([N+]([O-])=O)=C1N
11	Test	5,5'-Dinitro-3,3'-azo-1H-1,2,4-triazole	5769.03	O=[N+](C1=NC(/N=N/C2=NNC([N+]([O-])=O)=N2)=NN1)[O-]
12	Train	3,6-Bis(1H-1,2,3,4-tetrazolyl-5-amino)-1,2,4,5-tetrazine	3926.25	NN1NC(N3N=NN=C3)=NN=C1N2N=NN=C2
13	Train	3,3'-Azobis(6-amino-1,2,4,5-tetrazine)	4587.84	NC1=NN=C(/N=N/C2=NN=C(N)N=N2)N=N1
14	Test	3,6-Diaminotetrazine-1,4-dioxide	4583.73	[O-][N+]1=NN(N)[NH+]([O-])C=C1N
15	Train	3,6-Dinitropyrazolyl[4,3-c]pyrazole	5978.72	O=[N+](C1=NNC2=C1NN=C2[N+]([O-])=O)[O-]
16	Train	Pentaerythritol tetraazide acetate	4679.37	OCC(C(OC(C)=O)N=[N+]=[N-])(CO)C(N=[N+]=[N-])(N=[N+]=[N-])ON=[N+]=[N-]
17	Train	1,3-Dinitrobenzene	5893.03	O=[N+](C1=CC([N+]([O-])=O)=CC=C1)[O-]
18	Train	1,3,5-Trinitrobenzene	6479.23	O=[N+](C1=CC([N+]([O-])=O)=CC([N+]([O-])=O)=C1)[O-]
19	Train	1-methyl-2,4-dinitrobenzene	5685.92	O=[N+](C1=CC=C(C)C([N+]([O-])=O)=C1)[O-]
20	Train	2,4,6-Trinitrotoluene	6342.3	CC1=C([N+]([O-])=O)C=C([N+]([O-])=O)C=C1[N+]([O-])=O
21	Train	2,4-Dimethyl-1,3,5-trinitrobenzene	6241.88	O=[N+](C1=C(C)C([N+]([O-])=O)=C(C)C([N+]([O-])=O)=C1)[O-]
22	Test	1-chloro-2,4-dinitrobenzene	4734.16	O=[N+](C1=CC=C(Cl)C([N+]([O-])=O)=C1)[O-]
23	Train	2-chloro-1,3,5-trinitrobenzene	5602.02	O=[N+](C1=CC([N+]([O-])=O)=C(Cl)C([N+]([O-])=O)=C1)[O-]
24	Train	2,4,6-Trinitrophenol	6269.8	O=[N+](C1=C(O)C([N+]([O-])=O)=CC([N+]([O-])=O)=C1)[O-]
25	Train	2-methyl-4,6-dinitrophenol	5291.44	O=[N+](C1=C(O)C(C)=CC([N+]([O-])=O)=C1)[O-]
26	Train	3-methyl-2,4,6-trinitrophenol	6218.08	O=[N+](C1=C(O)C([N+]([O-])=O)=C(C)C([N+]([O-])=O)=C1)[O-]
27	Train	2,4-Dinitroanisole	5774.82	COC1=CC=C([N+]([O-])=O)C=C1[N+]([O-])=O
28	Train	2-methoxy-1,3,5-trinitrobenzene	6384.33	O=[N+](C1=CC([N+]([O-])=O)=C(OC)C([N+]([O-])=O)=C1)[O-]
29	Test	2,3,4,6-Tetranitroaniline	6620.19	NC1=C([N+]([O-])=O)C=C([N+]([O-])=O)C([N+]([O-])=O)=C1[N+]([O-])=O
30	Train	1,3-Diamino-2,4,6-trinitrobenzene	5277.62	O=[N+](C1=C(N)C([N+]([O-])=O)=C(N)C([N+]([O-])=O)=C1)[O-]
31	Test	1,3,5-triamino-2,4,6-trinitrobenzene	4849.82	O=[N+](C1=C(N)C([N+]([O-])=O)=C(N)C([N+]([O-])=O)=C1N)[O-]
32	Train	2,4-Dinitrophenylhydrazine	5400.78	NNC1=CC=C([N+]([O-])=O)C=C1[N+]([O-])=O
33	Train	2,4,6-Trinitrobenzoic acid	6013.23	O=C(O)C1=C([N+]([O-])=O)C=C([N+]([O-])=O)C=C1[N+]([O-])=O
34	Train	1,5-Dinitronaphthalene	5627.11	O=[N+](C1=CC=CC2=C([N+]([O-])=O)C=CC=C12)[O-]
35	Train	1,8-Dinitronaphthalene	5727.06	O=[N+](C1=CC=CC2=CC=CC([N+]([O-])=O)=C12)[O-]
36	Train	1,3,6,8-Tetranitronaphthalene	6523.65	O=[N+](C1=CC([N+]([O-])=O)=CC2=CC([N+]([O-])=O)=CC([N+]([O-])=O)=C12)[O-]
37	Test	Hexanitrodiphenyl ether	6897.36	O=[N+](C1=C([N+]([O-])=O)C([N+]([O-])=O)=C([N+]([O-])=O)C([N+]([O-])=O)=C1OC2=CC=CC=C2[N+]([O-])=O)[O-]
38	Train	Hexanitrodiphenyl sulfide	6212.12	O=[N+](C1=C([N+]([O-])=O)C([N+]([O-])=O)=C([N+]([O-])=O)C([N+]([O-])=O)=C1SC2=CC=CC=C2[N+]([O-])=O)[O-]
39	Train	2,4,6-Trinitrobenzidine	6784.2	NC1([N+]([O-])=O)C=C([N+]([O-])=O)C(C2=CC=C(N)C=C2)=C([N+]([O-])=O)C1
40	Train	Hexanitroazobenzene	7105.37	O=[N+](C1=C([N+]([O-])=O)C([N+]([O-])=O)=C([N+]([O-])=O)C([N+]([O-])=O)=C1/N=N/C2=CC=CC=C2[N+]([O-])=O)[O-]
41	Train	3,4-Bis ( picrylamino)Furazan	6426.36	O=[N+](C1=CC([N+]([O-])=O)=CC([N+]([O-])=O)=C1NC2=NON=C2NC3=C([N+]([O-])=O)C=C([N+]([O-])=O)C=C3[N+]([O-])=O)[O-]
42	Train	1,4,6-Trinitro-1,4,6-Triazacycloheptane-2,3-Furazan	5271.44	O=[N+](N2CN([N+]([O-])=O)C1=NON=C1N([N+]([O-])=O)C2)[O-]
43	Train	1,4,5,8-tetranitro-1,4,5,8-tetraazahydronaphthalene-2,3-furazan	7153.57	O=[N+](N(CCN3[N+]([O-])=O)C2C3N([N+]([O-])=O)C1=NON=C1N2[N+]([O-])=O)[O-]
44	Train	1,4-Dinitropiperazine-2,3-co(N,N'-dinitroimidazolidine)-5,6-fluorofurazan	7445.56	O=[N+](N1C(N([N+]([O-])=O)C2=NON=C2N3[N+]([O-])=O)C3N([N+]([O-])=O)C1)[O-]
45	Train	1-Nitropiperazine-2,3-co(1',3'-dinitroimidazolidinone-2')-5,6-nafurazan	7390.33	O=C3N([N+]([O-])=O)C2NC1=NON=C1N([N+]([O-])=O)C2N3[N+]([O-])=O
46	Train	1,4,5,8-tetranitro-1,4,5,8-tetraazahydronaphthalene-2,3,6,7-difurazan	7603.01	O=[N+](N2C1=NON=C1N([N+]([O-])=O)C4C2N([N+]([O-])=O)C3=NON=C3N4[N+]([O-])=O)[O-]
47	Train	4,4'-heavy (N-trinitroethyl-N-nitro)-3,3'-difurazan	7830.64	O=[N+](N(CC([N+]([O-])=O)([N+]([O-])=O)[N+]([O-])=O)C1=NON=C1C2=NON=C2N([N+]([O-])=O)CC([N+]([O-])=O)([N+]([O-])=O)[N+]([O-])=O)[O-]
48	Train	Heavy (N-trinitroethyl-N-nitro)furazan	6795.58	O=[N+](N(C1=NON=C1N([N+]([O-])=O)CC([N+]([O-])=O)([N+]([O-])=O)[N+]([O-])=O)CC([N+]([O-])=O)([N+]([O-])=O)[N+]([O-])=O)[O-]
49	Train	3,4-Bisnitrofurazanfuroxan	7706.95	[O][N]1=C([N+]([O-])=O)C([N+]([O-])=O)=NO1
50	Train	7-amino-4,6-dinitrobenzofuroxan	6326.21	[O][N]1=C2C(C(N)=C([N+]([O-])=O)C=C2[N+]([O-])=O)=NO1
51	Train	Benzofuroxan	7588.94	[O][N]4=C3C1=NO[N]([O])=C1C2=NO[N]([O])=C2C3=NO4
52	Train	4,6-Dinitro-5,7-diaminobenzofuroxan	5787.93	NC2=C([N+]([O-])=O)C(N)=C([N+]([O-])=O)C1=NO[N]([O])=C12
53	Train	3,3'-Diamino-4,4'-Azofuroxan	7710.74	NC1=NON=C1/[N]([O])=N\C2=NON=C2N
54	Train	3,4-Dicyanoflurane	6645.14	N#CC1=NO[N]([O])=C1C#N
55	Train	4,4'-Dinitroazofuroxan	8250.98	[O][N]1=C([N+]([O-])=O)C(/N=N\C2=NO[N]([O])=C2[N+]([O-])=O)=NO1
56	Test	3,4-Dicarboxylate bis(trinitroethyl) nitrogen oxide	7331.25	O=C(CC([N+]([O-])=O)([N+]([O-])=O)[N+]([O-])=O)OC1=NO[N]([O])=C1OC(CC([N+]([O-])=O)([N+]([O-])=O)[N+]([O-])=O)=O
57	Test	Bis(2-fluoro-2,2-dinitroethyl)nitroamine	5502.45	O=[N+](N(CC([N+]([O-])=O)(F)[N+]([O-])=O)CC([N+]([O-])=O)(F)[N+]([O-])=O)[O-]
58	Train	1,1,3,6,8,8-hexanitro-1,8-difluoro-3,6-diazaoctane	5667.22	FC([N+]([O-])=O)([N+]([O-])=O)CN([N+]([O-])=O)CCN([N+]([O-])=O)CC([N+]([O-])=O)([N+]([O-])=O)F
59	Train	1,3-Dinitro-4,5-bis(2-fluoro-2,2-dinitroethylnitroamino)-imidazolidinone-2	5964	O=C1N([N+]([O-])=O)C(N(CC([N+]([O-])=O)(F)[N+]([O-])=O)[N+]([O-])=O)C(N(CC([N+]([O-])=O)(F)[N+]([O-])=O)[N+]([O-])=O)N1[N+]([O-])=O
60	Train	1,1,3,5,5,7,9,9-octanitro-1,9,-difluoro-3,7-diazanonane	6226.58	FC([N+]([O-])=O)([N+]([O-])=O)CN([N+]([O-])=O)CC([N+]([O-])=O)([N+]([O-])=O)CN([N+]([O-])=O)CC([N+]([O-])=O)([N+]([O-])=O)F
61	Train	2,6-Dinitro-bis(difluoroaminomethyl)-2,4,6,8-tetraazabicyclo[3,3,0]octanedione-3,7	4142.13	O=C(N(CN(F)F)C1[N][N+]([O-])=O)N([N+]([O-])=O)C1(CN(F)F)NC=O
62	Test	Bis(2-fluoro-2,2-dinitroethanol) acetal	4958.57	O=[N+](C([N+]([O-])=O)(F)COCOCC([N+]([O-])=O)(F)[N+]([O-])=O)[O-]
63	Test	1-Fluoro-1,1-dinitro-4,4-bis(trifluoromethyl)-3,5-dioxane	1181.38	FC(C1(C(F)(F)F)OC[C]([N+]([O-])=O)([N+]([O-])=O)(F)CO1)(F)F
64	Train	Bis(2-fluoro-2,2-dinitroethyl)difluoroformaldehyde	3242.55	O=[C](F)(CC([N+]([O-])=O)(F)[N+]([O-])=O)(CC([N+]([O-])=O)(F)[N+]([O-])=O)F
65	Train	2,2-Difluoro-2-nitroethyl trifluoromethane-sulfonate	127.94	O=S(C(F)(F)F)(OCC(F)(F)[N+]([O-])=O)=O
66	Train	Bis(2-fluoro-2,2-dinitroethyl)acetal	4840.04	FC([N+]([O-])=O)([N+]([O-])=O)OC(C)OC(F)([N+]([O-])=O)[N+]([O-])=O
67	Train	1,1,4-Trifluoro-1,4,4-Trinitro-3-oxabutane	3162.74	O=[N+](C([N+]([O-])=O)(F)OCC(F)(F)[N+]([O-])=O)[O-]
68	Train	1,5-Difluoro-1,1,5,5-tetranitro-3-oxapentane	5069.14	O=[N+](C([N+]([O-])=O)(F)COCC([N+]([O-])=O)(F)[N+]([O-])=O)[O-]
69	Test	1,9-Difluoro-1,1,5,5,9,9-hexanitro-3,7-dioxanonane	5802.63	O=[N+](C([N+]([O-])=O)(F)COCC([N+]([O-])=O)([N+]([O-])=O)COCC([N+]([O-])=O)(F)[N+]([O-])=O)[O-]
70	Train	2-fluoro-2,2-dinitroethyl nitrate	3913.33	O=[N+]([O-])OCC([N+]([O-])=O)(F)[N+]([O-])=O
71	Train	Bis(2-fluoro-2,2-dinitroethyl) sulfate	4329.86	O=S(OCC([N+]([O-])=O)(F)[N+]([O-])=O)(OCC([N+]([O-])=O)(F)[N+]([O-])=O)=O
72	Train	1,1,1,4-Tetrafluoro-4,4-dinitro-3-oxabutane	665.02	O=[N+](C([N+]([O-])=O)(F)OCC(F)(F)F)[O-]
73	Train	1,12-Difluoro-1,1,12,12-tetranitro-3,5,8,10-tetraoxadodecane	5225.75	O=[N+](C([N+]([O-])=O)(F)COCOCCOCOCC([N+]([O-])=O)(F)[N+]([O-])=O)[O-]
74	Test	1,1,7-Trifluoro-4-methyl-1,7,7-trinitro-3,5-dioxaheptane	3726.09	O=[N+](C([N+]([O-])=O)(F)COC(C)OCC(F)(F)[N+]([O-])=O)[O-]
75	Train	1,1,7-Trifluoro-1,7,7-trinitro-3,5-dioxaheptane	3242.38	O=[N+](C([N+]([O-])=O)(F)COCOCC(F)(F)[N+]([O-])=O)[O-]
76	Train	Methyl 4-fluoro-4,4-dinitrobutyrate	4097.77	O=C(OC)CCC([N+]([O-])=O)(F)[N+]([O-])=O
77	Train	1,7-Difluoro-4-methoxy-1,1,7,7-tetranitro-3,5-dioxaheptane	4822.29	O=[N+](C([N+]([O-])=O)(F)COC(OC)OCC([N+]([O-])=O)(F)[N+]([O-])=O)[O-]
78	Test	1,4,4,7,7-Pentafluoro-1,1,7-trinitro-3,5-dioxaheptane	1610.1	O=[N+](C(F)(F)COC(F)(F)OCC([N+]([O-])=O)(F)[N+]([O-])=O)[O-]
79	Train	1,1,1,7,7,13,13,13-octafluoro-4,4,10,10-tetranitro-2,6,8,12-tetraoxatridecane	1270.04	O=[N+](C(COC(F)(F)F)([N+]([O-])=O)COC(F)(F)OCC([N+]([O-])=O)([N+]([O-])=O)COC(F)(F)F)[O-]
80	Train	4-fluoro-4,4-dinitrobutyric acid 2,2,2-trifluoroethyl ester	1172.33	O=C(OCC(F)(F)F)CCC([N+]([O-])=O)(F)[N+]([O-])=O
81	Train	1,1,1-Trifluoro-4,4,4-Trinitro-2-oxabutane	3068.09	O=[N+](C([N+]([O-])=O)([N+]([O-])=O)COC(F)(F)F)[O-]
82	Train	1,1,1,4-tetrafluoro-4,4-dinitro-2-oxabutane	641.43	O=[N+](C([N+]([O-])=O)(F)COC(F)(F)F)[O-]
83	Train	1,1,1-Trifluoro-4,4-dinitro-2-oxapentane	1503.22	CC([N+]([O-])=O)([N+]([O-])=O)COC(F)(F)F
84	Test	1,1,1,7,7,7-hexafluoro-4,4-dinitro-2,6-dioxaheptane	624.78	O=[N+](C(COC(F)(F)F)([N+]([O-])=O)COC(F)(F)F)[O-]
85	Test	1-Fluoro-1,1,3,3-Tetranitro-5-oxahexane	5956.91	COCC([N+]([O-])=O)([N+]([O-])=O)CC([N+]([O-])=O)(F)[N+]([O-])=O
86	Train	4,4-bis(difluoroamino)-1,7-difluoro-1,1,7,7-tetranitro-3,5-dioxaheptane	4997.84	O=[N+](C([N+]([O-])=O)(F)COC(N(F)F)(N(F)F)OCC([N+]([O-])=O)(F)[N+]([O-])=O)[O-]
87	Train	1,1,1,13,13,13-hexafluoro-4,4,10,10-tetranitro-2,6,8,12-tetraoxatridecane	2244.93	O=[N+](C(COC(F)(F)F)([N+]([O-])=O)COCOCC([N+]([O-])=O)([N+]([O-])=O)COC(F)(F)F)[O-]
88	Test	1,7-Difluoro-1,1,7,7-tetranitro-4-trifluoromethyl-3,5-dioxaheptane	2656.09	FC(C(OCC([N+]([O-])=O)(F)[N+]([O-])=O)OCC([N+]([O-])=O)(F)[N+]([O-])=O)(F)F
89	Test	1-Fluoro-1,1-dinitro-4-trifluoromethyl-3,5-dioxane	1276.16	FC(C1OC[C]([N+]([O-])=O)([N+]([O-])=O)(F)CO1)(F)F
90	Train	1-fluoro-4-difluoronitromethyl-1,1-dinitro-4-trifluoromethyl-3,5-dioxaheptane	1295	CCOC(C(F)(F)F)(C(F)(F)[N+]([O-])=O)OCC([N+]([O-])=O)(F)[N+]([O-])=O
91	Train	1,1,1,4,4,7-hexafluoro-7,7-dinitro-3,5-dioxaheptane	651.1	O=[N+](C([N+]([O-])=O)(F)COC(F)(F)OCC(F)(F)F)[O-]
92	Test	1,1,1-Trifluoro-7,7,7-trinitro-3,5-dioxaheptane	3272.66	O=[N+](C([N+]([O-])=O)([N+]([O-])=O)COCOCC(F)(F)F)[O-]
93	Train	7,7-bis(difluoroamino)-1,3,3,5-tetranitro-1,5-diazacyclooctane	4724.64	O=[N+](N1CC([N+]([O-])=O)([N+]([O-])=O)CN([N+]([O-])=O)CC(N(F)F)(N(F)F)C1)[O-]
94	Train	Hexanitrohexaazaisowurtzitane	7147.42	O=[N+]([O-])N(C1C2N(C4C3N2[N+]([O-])=O)[N+]([O-])=O)C(N3[N+]([O-])=O)C(N4[N+]([O-])=O)N1[N+]([O-])=O
95	Train	Hexanitrohexaazaadamantane	6422.31	O=[N+](N1N3C([N+]([O-])=O)([N+]([O-])=O)C2([N+]([O-])=O)N([N+]([O-])=O)N(C3)N([N+]([O-])=O)N1C2)[O-]
96	Test	Hexanitrohexaaza-Wurtzane	7112.75	O=[N+](N([N+]([O-])=O)[NH]1([N+]([O-])=O)[NH]([N+]([O-])=O)([N+]([O-])=O)N=NN=C1[N+]([O-])=O)[O-]
97	Train	Octanitro Cubeane	9275.51	O=[N+](C12C3([N+]([O-])=O)C5([N+]([O-])=O)C([N+]([O-])=O)1C4([N+]([O-])=O)C([N+]([O-])=O)2C([N+]([O-])=O)3C45[N+]([O-])=O)[O-]
98	Test	1,3,5,7-Tetranitroadamantane	8691.12	O=[N+](C1(C2)CC(C3)([N+]([O-])=O)CC2([N+]([O-])=O)CC3([N+]([O-])=O)C1)[O-]
99	Train	Ethylenedinitroamine	5740.49	O=[N+](N1C([N+]([O-])=O)C1)[O-]
100	Test	Nitroguanidine	4162.22	NC(N[N+]([O-])=O)=N
101	Train	1,3,5-Trinitro-1,3,5-Triazacyclohexane	6555.39	O=[N+](N1CN([N+]([O-])=O)CN([N+]([O-])=O)C1)[O-]
102	Train	Cyclotrimethylenetrinitrosamine	5901.58	O=NN1C(N=O)(N=O)CC1
103	Train	1,3,5,7-tetranitro-1,3,5,7-tetraazacyclooctane	6626.72	O=[N+](N1CN([N+]([O-])=O)CN([N+]([O-])=O)CN([N+]([O-])=O)C1)[O-]
104	Train	2,4,6-Trinitrobenzidine	5947.78	NC1([N+]([O-])=O)C=C([N+]([O-])=O)C(C2=CC=C(N)C=C2)=C([N+]([O-])=O)C1
105	Test	Ethyl Nitramine Dinitrate	6808.48	N[N+]([O-])=O.O=[N+]([O-])OCC.O[N+]([O-])=O
106	Test	1-Carbonyl-2,4,6-trinitro-2,4,6-triazacyclohexane	6510.31	O=[N+](N1CN([N+]([O-])=O)CN([N+]([O-])=O)C1=C=O)[O-]
107	Train	1,4-Dinitroglycoluril	5412.47	O=C(NC1N2[N+]([O-])=O)N([N+]([O-])=O)C1NC2=O
108	Train	Tetranitroglycoluril	6558.11	O=C(N([N+]([O-])=O)C([N+]([O-])=O)1N2[N+]([O-])=O)N([N+]([O-])=O)C1NC2=O
109	Train	Tetranitropropane diurea (2,4,6,8-tetranitro-2,4,6,8-tetraazabicyclo[3,3,1]nonanedione-3,7)	6923.13	O=C(N([N+]([O-])=O)C2N1[N+]([O-])=O)N([N+]([O-])=O)C(C2)N([N+]([O-])=O)C1=O
110	Train	1,3,3,5,7,7-hexanitro-1,5-diazacyclooctane	7202.02	O=[N+](C1([N+]([O-])=O)CN([N+]([O-])=O)CC([N+]([O-])=O)([N+]([O-])=O)CN([N+]([O-])=O)C1)[O-]
111	Train	Trinitrophenyl nitramine	6577.12	O=[N+]([O-])NC1=CC=C([N+]([O-])=O)C([N+]([O-])=O)=C1[N+]([O-])=O
112	Train	Ethyl trinitrophenylnitramine nitrate	7001.75	O=[N+]([O-])N([N+]([O-])=O)C1=CC=CC([N+]([O-])=O)=C1[N+]([O-])=O.O=[N+]([O-])OCC
113	Train	1,1,1,3,5,5,5-Heptanitro-3-azapentane	6049.45	O=[N+](C([N+]([O-])=O)([N+]([O-])=O)CN([N+]([O-])=O)CC([N+]([O-])=O)([N+]([O-])=O)[N+]([O-])=O)[O-]
114	Train	1-nitroso-3,3,5,7,7-pentanitro-1,5-diazacyclooctane	7362.91	O=[N+](C1([N+]([O-])=O)CN([N+]([O-])=O)CC([N+]([O-])=O)([N+]([O-])=O)CN(N=O)C1)[O-]
115	Test	1,5-Dinitroso-3,3,7,7-tetranitro-1,5-diazacyclooctane	7613.27	O=[N+](C1([N+]([O-])=O)CN(N=O)CC([N+]([O-])=O)([N+]([O-])=O)CN(N=O)C1)[O-]
116	Train	1-Nitrooxyethyl-3,3,5,7,7-pentanitro-1,5-diazacyclooctane	6996.43	O=[N+](C1([N+]([O-])=O)CN([N+]([O-])=O)CC([N+]([O-])=O)([N+]([O-])=O)CN(C(O[N+]([O-])=O)C)C1)[O-]
117	Test	1,3,5,5-Tetranitro-1,3-diazepine	6934.62	O=[N+](C1([N+]([O-])=O)CN([N+]([O-])=O)CN([N+]([O-])=O)C=C1)[O-]
118	Train	1,3,3,5-tetranitro-1,5-diazepane	6745.61	O=[N+](N1CC([N+]([O-])=O)([N+]([O-])=O)CN([N+]([O-])=O)CC1)[O-]
119	Test	1,2-Dinitroguanidine	5516.18	N/C(N[N+]([O-])=O)=N\[N+]([O-])=O
120	Train	1-nitro-3-azido-azetidine	6043.37	[N-]=[N+]=NC1CN([N+]([O-])=O)C1
121	Train	1,3,3-Trinitroazetidine	7350.6	O=[N+](C1([N+]([O-])=O)CN([N+]([O-])=O)C1)[O-]
122	Train	Hexanitroethane	3579.88	O=[N+](C([N+]([O-])=O)([N+]([O-])=O)C([N+]([O-])=O)([N+]([O-])=O)[N+]([O-])=O)[O-]
123	Train	N-nitro-N-trinitroethyl methylamine	7413.06	CN([N+]([O-])=O)CC([N+]([O-])=O)([N+]([O-])=O)[N+]([O-])=O
124	Train	Bis(2,2,2-trinitroethyl-N-nitro)ethylenediamine	7724.79	NCC(CC([N+]([O-])=O)([N+]([O-])=O)[N+]([O-])=O)(CC([N+]([O-])=O)([N+]([O-])=O)[N+]([O-])=O)N[N+]([O-])=O
125	Train	4,4,4-Trinitrobutyric acid-2',2',2'-trinitroethyl ester	7296.96	O=C(OCC([N+]([O-])=O)([N+]([O-])=O)[N+]([O-])=O)CCC([N+]([O-])=O)([N+]([O-])=O)[N+]([O-])=O
126	Test	Bis(2,2,2-trinitroethyl) formal	7131	O=[N+](C([N+]([O-])=O)([N+]([O-])=O)COCOCC([N+]([O-])=O)([N+]([O-])=O)[N+]([O-])=O)[O-]
127	Train	1,1,1,3-Tetranitropropane	7476.78	O=[N+](CCC([N+]([O-])=O)([N+]([O-])=O)[N+]([O-])=O)[O-]
128	Test	N,N-bis(trinitroethyl)nitroamine	6051.35	O=[N+](N(CC([N+]([O-])=O)([N+]([O-])=O)[N+]([O-])=O)CC([N+]([O-])=O)([N+]([O-])=O)[N+]([O-])=O)[O-]
129	Train	N-(2,2,2-trinitroethyl)-N-nitro-2,4,6-trinitroaniline	7456.29	O=[N+](C1=C(C([N+]([O-])=O)=CC([N+]([O-])=O)=C1)N(CC([N+]([O-])=O)([N+]([O-])=O)[N+]([O-])=O)[N+]([O-])=O)[O-]
130	Train	N-(2,2,2-Trinitroethyl)-N-nitro-aminoacetic acid trinitroethyl ester	7000.29	O=C(OCC([N+]([O-])=O)([N+]([O-])=O)[N+]([O-])=O)CN(CC([N+]([O-])=O)([N+]([O-])=O)[N+]([O-])=O)[N+]([O-])=O
131	Train	Bis(trinitroethyl) adipate	6644.73	O=C(OCC([N+]([O-])=O)([N+]([O-])=O)[N+]([O-])=O)CCCCC(OCC([N+]([O-])=O)([N+]([O-])=O)[N+]([O-])=O)=O
132	Train	Bis(trinitroethyl)urea	6991.77	O=C(N)N(CC([N+]([O-])=O)([N+]([O-])=O)[N+]([O-])=O)CC([N+]([O-])=O)([N+]([O-])=O)[N+]([O-])=O
133	Test	Bis (trinitroethyl) oxalate	6361.9	O=C(OCC([N+]([O-])=O)([N+]([O-])=O)[N+]([O-])=O)C(OCC([N+]([O-])=O)([N+]([O-])=O)[N+]([O-])=O)=O
134	Train	Bis(trinitroethyl) succinate	6953.54	O=C(OCC([N+]([O-])=O)([N+]([O-])=O)[N+]([O-])=O)CCC(OCC([N+]([O-])=O)([N+]([O-])=O)[N+]([O-])=O)=O
135	Train	Pentaerythritol tetranitrate	7356.67	O=[N+]([O-])OCC(CO[N+]([O-])=O)(CO[N+]([O-])=O)CO[N+]([O-])=O
136	Train	Glycerol Trinitrate	7007.4	O=[N+]([O-])OCC(O[N+]([O-])=O)CO[N+]([O-])=O
137	Train	Nitroisobutyl glycerol trinitrate	7400.5	O=[N+]([O-])OC(C([N+]([O-])=O)C(C)C)C(O[N+]([O-])=O)CO[N+]([O-])=O
138	Test	Trinitroethanol sulfite	6510.14	O=[N+](C([N+]([O-])=O)(OS(O)=O)C[N+]([O-])=O)[O-]
139	Test	Trinitroethyl benzenesulfonate	4779.26	O=S(C1=CC=CC=C1)(OCC([N+]([O-])=O)([N+]([O-])=O)[N+]([O-])=O)=O
140	Train	Trinitroethyl m-nitrobenzenesulfonate	6742.93	O=S(C1=CC=CC([N+]([O-])=O)=C1)(OCC([N+]([O-])=O)([N+]([O-])=O)[N+]([O-])=O)=O
141	Train	Trinitroethyl p-toluenesulfonate	6342.09	CC1=CC=C(S(=O)(OCC([N+]([O-])=O)([N+]([O-])=O)[N+]([O-])=O)=O)C=C1
142	Train	Trinitroethyl dinitro p-toluenesulfonate	7159.54	CC1=CC(CC([N+]([O-])=O)([N+]([O-])=O)[N+]([O-])=O)=C(S(=O)(O[N+]([O-])=O)=O)C([N+]([O-])=O)=C1
143	Train	1,4-Dinitro-2,3,5,6-Tetranitropiperazine	5052.5	O=[N+](C1C([N+]([O-])=O)N([N+]([O-])=O)C([N+]([O-])=O)C([N+]([O-])=O)N1[N+]([O-])=O)[O-]
144	Test	1,3-Dinitro-4,5-bis(N,N'-dinitro-N,N'-dinitrooxymethyl)aminoimidazolidine	7207	O=[N+](/N=C1/N([N+]([O-])=O)C(CCO[N+]([O-])=O)([N+]([O-])=O)C(CCO[N+]([O-])=O)([N+]([O-])=O)N1[N+]([O-])=O)[O-]
145	Test	Glycerol dinitrate	6598.08	OCC(O[N+]([O-])=O)CO[N+]([O-])=O
146	Train	Chloroglycerol dinitrate	5374.26	OCC(O[N+]([O-])=O)C(O[N+]([O-])=O)Cl
147	Train	Glycerol acetate dinitrate	5984.08	CC(OCC(O[N+]([O-])=O)CO[N+]([O-])=O)=O
148	Test	Diglycerol tetranitrate	7100.3	O=[N+]([O-])O[C@H](CO[N+]([O-])=O)COC[C@@H](O[N+]([O-])=O)CO[N+]([O-])=O
149	Test	Ethylene glycol dinitrate	7064.18	O=[N+]([O-])OCCO[N+]([O-])=O
150	Train	Diethylene glycol dinitrate	6465.27	O=[N+]([O-])OCCOCCO[N+]([O-])=O
151	Test	Triethylene glycol dinitrate	6151.87	O=[N+]([O-])OCCOCCOCCO[N+]([O-])=O
152	Train	1,3-propanediol dinitrate	6676.02	O=[N+]([O-])OCCCO[N+]([O-])=O
153	Train	1,2-Propanediol dinitrate	6680.69	CC(O[N+]([O-])=O)CO[N+]([O-])=O
154	Test	1,3-Butanediol dinitrate	6390.64	CC(O[N+]([O-])=O)CCO[N+]([O-])=O
155	Train	1,2,4-Butanetriol Trinitrate	7121.1	O=[N+]([O-])OCC(O[N+]([O-])=O)CCO[N+]([O-])=O
156	Train	Isopentanetriol trinitrate	6869.41	CC(C)CC(O[N+]([O-])=O)(O[N+]([O-])=O)O[N+]([O-])=O
157	Test	Trimethylolpropane Trinitrate	6790.3	CCC(CO[N+]([O-])=O)(CO[N+]([O-])=O)CO[N+]([O-])=O
158	Train	Methyl nitrate	6452.55	O=[N+]([O-])OC
159	Train	Ethyl nitrate	5947.78	O=[N+]([O-])OCC
160	Train	N-propyl nitrate	5303.14	O=[N+]([O-])OCCC
161	Test	Isopropyl nitrate	5124.94	O=[N+]([O-])OC(C)C
162	Test	Dinitrophenoxy ethyl nitrate	6323.65	O=[N+]([O-])OC([N+]([O-])=O)([N+]([O-])=O)COC1=CC=CC=C1
