# Supplementary material for: Machine learning-based q-RASPR predictions of detonation heat for nitrogen-containing compounds
Source: Royal Society of Chemistry journal article supplement (doi:10.1039/d3ma00535f), 2023-01-01
Supplement: d3ma00535f2.pdf [file d3ma00535f2.pdf]

## **Machine learning-based q-RASPR predictions of detonation heat for nitrogen-containing compounds**

**Shubham Kumar Pandey, Arkaprava Banerjee, Kunal Roy\***

Department of Pharmaceutical Technology  
Jadavpur University, Kolkata 700032, India  
Email: [kunal.roy@jadavpuruniversity.in](mailto:kunal.roy@jadavpuruniversity.in)

### **Supplementary Materials SI-2**

\*Corresponding authors

Prof. Kunal Roy, Phone: +91 98315 94140;

Fax: +91-33-2837-1078

Email: [kunalroy\\_in@yahoo.com](mailto:kunalroy_in@yahoo.com); [kunal.roy@jadavpuruniversity.in](mailto:kunal.roy@jadavpuruniversity.in)

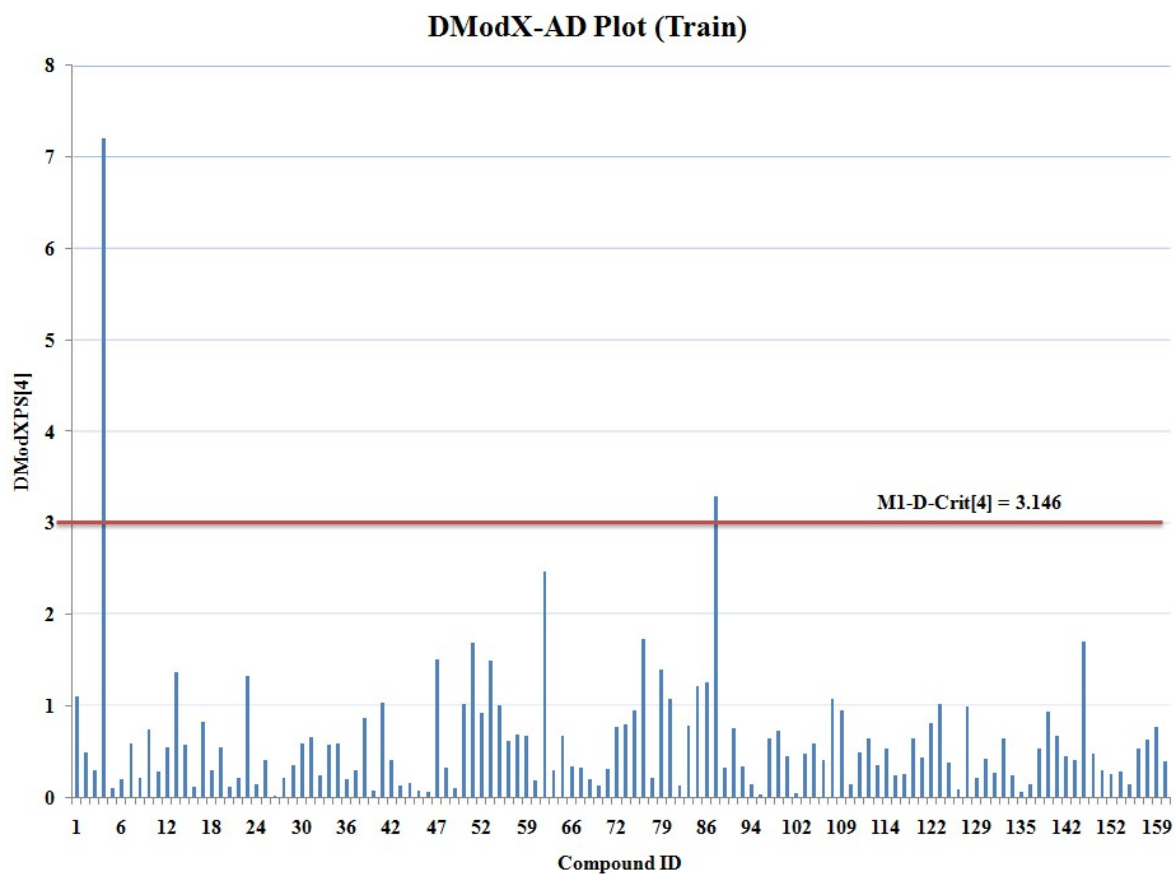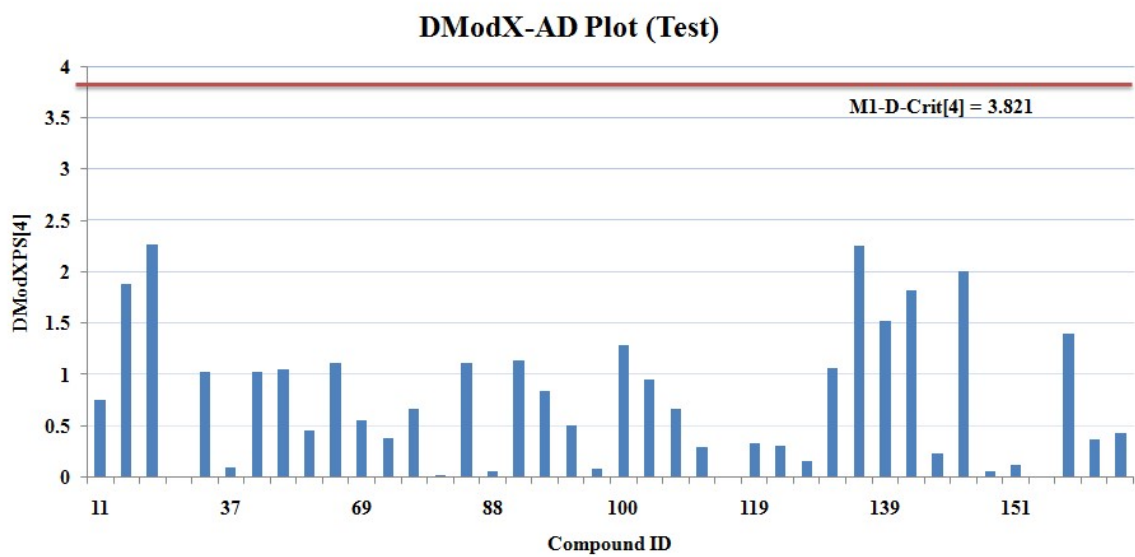

Figure S1: DModX-AD Plot of the q-RASPR model

### Loading Plot (Train)

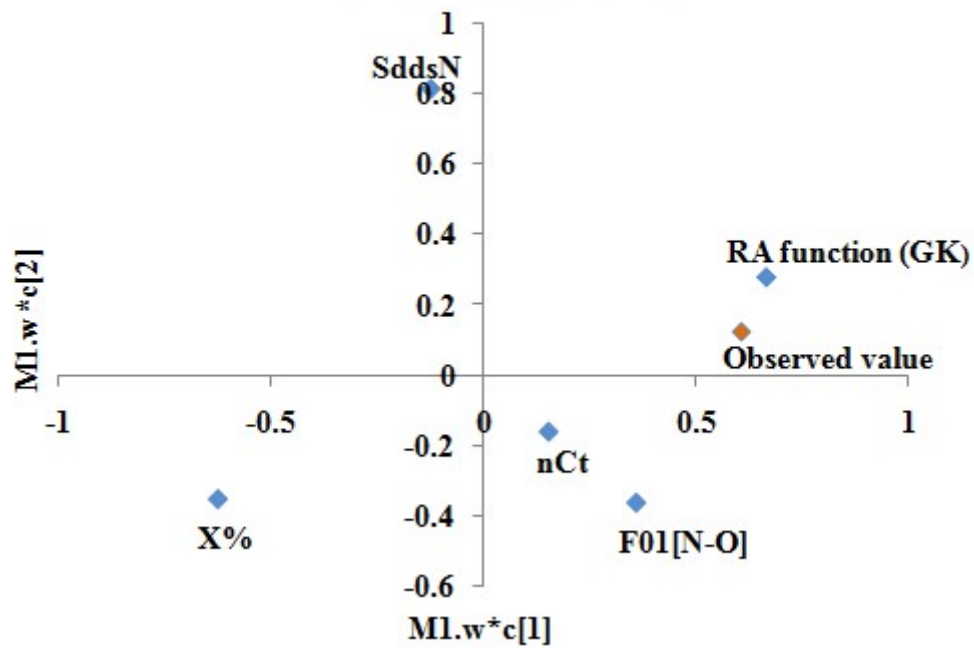

Figure S2: Loading plot of the q-RASPR model

### Coefficient Plot (Train)

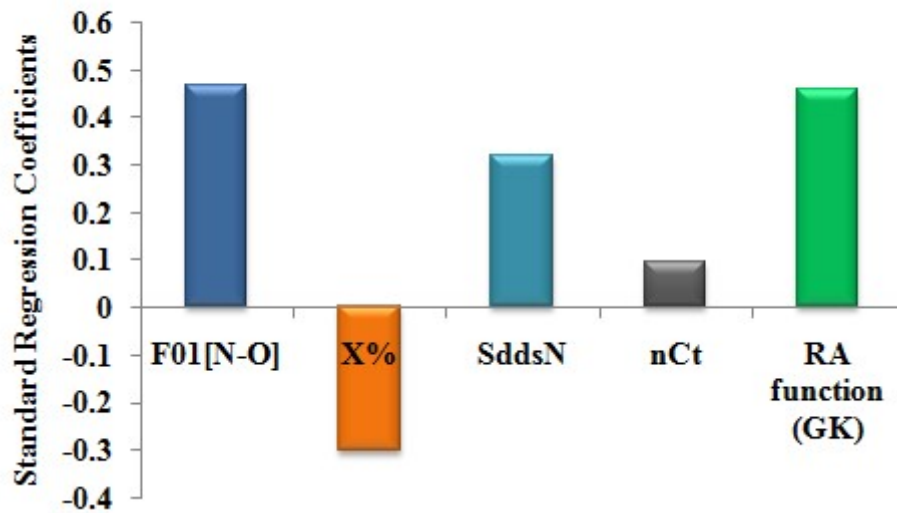

Figure S3: Coefficient plot of the q-RASPR model
